# Supplementary material for: Integrated hormone and transcriptome profiles provide insight into the pericarp differential development mechanism between Mandarin ‘Shatangju’ and ‘Chunhongtangju’
Source: Front Plant Sci. 2024 Oct 10;15:1461316. doi: 10.3389/fpls.2024.1461316 (PMC11499144; doi:10.3389/fpls.2024.1461316)
Supplement: Supplementary file 11 [file Table10.xlsx]

## Sheet: Sheet1
Supplementary Table S10. KEGG of highly correlated DEGs in different comparisons
LM1_vs_CK1
KEGG_map	Description	DiffRatio_meta	BgRatio_meta	P-value_meta	Adjusted P-value_meta	Index_meta	CID_meta	Count_meta	DiffRatio_gene	BgRatio_gene	P-value_gene	Adjusted P-value_gene	Index_gene	KO_gene	Count_gene	Hyperlink
ko00996	Biosynthesis of various alkaloids	1/5	4/17	0.792017	1	TRP	C00078	1	2/222	4/8018	0.00441364	0.370746	Cs_ont_1g002510;novel.695	K12644+K12643	2	https:\\www.genome.jp\dbget-bin\www_bget?map00996
ko01110	Biosynthesis of secondary metabolites	5/5	14/17	0.323529	1	TRP;TRA;Indole;GA24;GA53	C00078+C00398+C00463+C11861+C06094	5	72/222	2036/8018	0.0102399	0.860148	Cs_ont_1g019190;Cs_ont_2g002030;Cs_ont_1g002510;Cs_ont_2g033720;Cs_ont_1g008510;Cs_ont_1g029160;Cs_ont_5g048560;novel.68;Cs_ont_8g022530;Cs_ont_1g026230;Cs_ont_3g029490;Cs_ont_1g010900;Cs_ont_6g005780;Cs_ont_3g005820;Cs_ont_6g023360;Cs_ont_4g024700;Cs_ont_3g033190;Cs_ont_5g000210;Cs_ont_9g007840;Cs_ont_7g002920;Cs_ont_9g023380;Cs_ont_4g021230;Cs_ont_2g034230;Cs_ont_1g008300;Cs_ont_9g023740;Cs_ont…	K20623+K09840+K12644+K00454+K15813+K01913+K20772+K09833+K03527+K12356+K22395+K20623+K00059+K01593+K15397+K01853+K09753+K15404+K06892+K23136+K13065+K01623+K00430+K15813+K01193+K03527+K21568+K20772+K05278+K12643+K13065+K14173+K09841+K13066+K00430+K06892+K16818+K22374+K01853+K13066+K01803+K15404+K22395+K05282+K00430+K23136+K06892+K13065+K14190+K13065+K13065+K13832+K13496+K00927+K24541+K22395+K00927+…	72	https:\\www.genome.jp\dbget-bin\www_bget?map01110
ko00380	Tryptophan metabolism	3/5	3/17	0.0147059	0.176471	TRP;TRA;Indole	C00078+C00398+C00463	3	7/222	126/8018	0.0602206	1	Cs_ont_3g005820;Cs_ont_5g026850;novel.839;novel.719;Cs_ont_1g026400;novel.832;Cs_ont_4g007960	K01593+K13066+K13066+K24541+K11816+K13066+K11816	7	https:\\www.genome.jp\dbget-bin\www_bget?map00380
ko01100	Metabolic pathways	5/5	11/17	0.0746606	0.895928	TRP;TRA;Indole;GA24;GA53	C00078+C00398+C00463+C11861+C06094	5	99/222	3382/8018	0.250919	1	Cs_ont_1g019190;Cs_ont_2g002030;Cs_ont_2g014210;Cs_ont_9g011940;Cs_ont_7g023220;Cs_ont_2g033720;Cs_ont_5g049420;Cs_ont_1g029160;Cs_ont_5g048560;novel.68;Cs_ont_8g022530;Cs_ont_1g000870;Cs_ont_3g029500;Cs_ont_3g029490;Cs_ont_1g010900;Cs_ont_6g005780;Cs_ont_3g005820;Cs_ont_6g023360;Cs_ont_8g028720;Cs_ont_4g024700;Cs_ont_6g018900;Cs_ont_1g020460;Cs_ont_3g033190;Cs_ont_1g029150;Cs_ont_1g017990;Cs_ont…	K20623+K09840+K14379+K01728+K01728+K00454+K01179+K01913+K20772+K09833+K03527+K00423+K01784+K22395+K20623+K00059+K01593+K15397+K20547+K01853+K00799+K13248+K09753+K20547+K01535+K13065+K01054+K01623+K20547+K00430+K01183+K01193+K03940+K07964+K03527+K01183+K21568+K14175+K20772+K01051+K05278+K01054+K13065+K14379+K01051+K09841+K13066+K00430+K16818+K22374+K01853+K13066+K01803+K01184+K22395+K05282+K00430+…	99	https:\\www.genome.jp\dbget-bin\www_bget?map01100
ko00904	Diterpenoid biosynthesis	2/5	5/17	0.472043	1	GA24;GA53	C11861+C06094	2	2/222	41/8018	0.314613	1	Cs_ont_5g002240;Cs_ont_5g033110	K05282+K04125	2	https:\\www.genome.jp\dbget-bin\www_bget?map00904
ko01240	Biosynthesis of cofactors	1/5	1/17	0.294118	1	TRP	C00078	1	8/222	306/8018	0.617236	1	novel.68;Cs_ont_6g005780;Cs_ont_1g020460;Cs_ont_6g003260;Cs_ont_9g018990;Cs_ont_5g044330;Cs_ont_4g019120;novel.1124	K09833+K00059+K13248+K13800+K14190+K00940+K09833+K09833	8	https:\\www.genome.jp\dbget-bin\www_bget?map01240
ko01230	Biosynthesis of amino acids	1/5	2/17	0.514706	1	TRP	C00078	1	6/222	244/8018	0.674085	1	Cs_ont_4g021230;novel.846;Cs_ont_5g009120;Cs_ont_1g001200;Cs_ont_1g001290;Cs_ont_3g025990	K01623+K01803+K13832+K00927+K00927+K01803	6	https:\\www.genome.jp\dbget-bin\www_bget?map01230
ko00400	Phenylalanine, tyrosine and tryptophan biosynthesis	2/5	3/17	0.191176	1	TRP;Indole	C00078+C00463	2	1/222	55/8018	0.787667	1	Cs_ont_5g009120	K13832	1	https:\\www.genome.jp\dbget-bin\www_bget?map00400
LM2_vs_CK2
ko01100	Metabolic pathways	7/10	11/17	0.484163	1	ABA;Indole;GA24;GA53;t-CA;SA;Phe	C06082+C00463+C11861+C06094+C00423+C00805+C00079	7	306/616	3382/8018	5.70883e-05	0.00685059	Cs_ont_1g000790;Cs_ont_1g000870;Cs_ont_1g016810;Cs_ont_1g017780;Cs_ont_1g019190;Cs_ont_1g022340;Cs_ont_1g022500;Cs_ont_1g024230;Cs_ont_1g025870;Cs_ont_1g028230;Cs_ont_2g001850;Cs_ont_2g002030;Cs_ont_2g006830;Cs_ont_2g006950;Cs_ont_2g007730;Cs_ont_2g009080;Cs_ont_2g014210;Cs_ont_2g014610;Cs_ont_2g015450;Cs_ont_2g017340;Cs_ont_2g018300;Cs_ont_2g020690;Cs_ont_2g025950;Cs_ont_2g029030;Cs_ont_2g029120…	K01858+K00423+K02695+K00850+K20623+K01662+K00600+K13260+K02716+K02641+K02115+K09840+K03146+K05350+K02698+K02694+K14379+K01580+K02699+K08913+K05933+K02636+K05298+K08695+K01673+K00830+K05298+K03542+K10534+K01610+K00855+K02639+K08909+K00281+K06617+K08905+K15227+K01535+K00131+K11816+K02693+K08916+K03541+K11517+K00128+K01179+K09590+K01602+K04035+K03841+K22588+K01100+K08915+K02437+K01114+K01188+K08908+…	306	https:\\www.genome.jp\dbget-bin\www_bget?map01100
ko01110	Biosynthesis of secondary metabolites	9/10	14/17	0.360294	1	ABA;Indole;GA24;GA53;MEJA;t-CA;SA;Phe;5DS	C06082+C00463+C11861+C06094+C11512+C00423+C00805+C00079+C18037	9	197/616	2036/8018	7.83984e-05	0.00940781	Cs_ont_1g000790;Cs_ont_1g017780;Cs_ont_1g019190;Cs_ont_1g022340;Cs_ont_1g022500;Cs_ont_1g024230;Cs_ont_2g002030;Cs_ont_2g006950;Cs_ont_2g014610;Cs_ont_2g018300;Cs_ont_2g029030;Cs_ont_2g031290;Cs_ont_2g035200;Cs_ont_2g035210;Cs_ont_3g012580;Cs_ont_4g005440;Cs_ont_4g007430;Cs_ont_4g024260;Cs_ont_5g032990;Cs_ont_5g046100;Cs_ont_5g050390;Cs_ont_6g002940;Cs_ont_6g003980;Cs_ont_6g006550;Cs_ont_6g015890…	K01858+K00850+K20623+K01662+K00600+K13260+K09840+K05350+K01580+K05933+K08695+K00830+K13071+K13071+K01610+K00281+K12355+K15227+K11517+K00128+K17911+K09590+K01602+K04035+K03841+K22588+K02437+K01114+K01188+K14272+K02303+K09843+K01623+K00058+K00026+K15893+K00975+K03403+K00264+K13065+K13066+K09841+K12356+K01807+K20772+K10960+K01087+K23094+K13065+K00600+K19269+K18857+K00454+K05894+K00276+K00927+K12153+…	197	https:\\www.genome.jp\dbget-bin\www_bget?map01110
ko04075	Plant hormone signal transduction	2/10	4/17	0.838235	1	ABA;SA	C06082+C00805	2	78/616	700/8018	0.000391703	0.0470044	Cs_ont_4g025270;Cs_ont_8g002350;Cs_ont_5g004250;Cs_ont_4g022530;Cs_ont_3g020840;Cs_ont_8g002370;Cs_ont_6g006150;novel.1073;Cs_ont_7g010850;Cs_ont_5g033850;Cs_ont_5g005120;Cs_ont_6g009950;Cs_ont_5g026380;Cs_ont_8g019320;Cs_ont_8g004560;Cs_ont_7g011760;Cs_ont_6g000160;Cs_ont_9g021680;Cs_ont_4g010930;Cs_ont_3g019530;Cs_ont_4g004590;Cs_ont_2g017480;Cs_ont_3g002510;Cs_ont_7g024150;Cs_ont_5g013110;Cs_o…	K13422+K14494+K14506+K14488+K14491+K14494+K14510+K13415+K13422+K13415+K13422+K14493+K14486+K14488+K14486+K14491+K13416+K12126+K13422+K14484+K13415+K14494+K14488+K13416+K16189+K12126+K12126+K14493+K14493+K13416+K16189+K14516+K13422+K14498+K12126+K13415+K13416+K14487+K14488+K13416+K14510+K13416+K14488+K14494+K14491+K14484+K14431+K13415+K14510+K13415+K14491+K14488+K14516+K13416+K14484+K13415+K13449+…	78	https:\\www.genome.jp\dbget-bin\www_bget?map04075
ko02010	ABC transporters	1/10	1/17	0.588235	1	Phe	C00079	1	16/616	121/8018	0.0223633	1	Cs_ont_4g020240;Cs_ont_5g012790;Cs_ont_6g007640;Cs_ont_1g015000;Cs_ont_1g020360;Cs_ont_6g009850;Cs_ont_1g014990;Cs_ont_7g020090;Cs_ont_4g020230;Cs_ont_1g018510;Cs_ont_7g004310;Cs_ont_7g022840;Cs_ont_6g025440;Cs_ont_6g025920;Cs_ont_1g015020;Cs_ont_1g015010	K05666+K05666+K05681+K05681+K05666+K05681+K05681+K05681+K05666+K05658+K05658+K05666+K05681+K05681+K05681+K05681	16	https:\\www.genome.jp\dbget-bin\www_bget?map02010
ko00960	Tropane, piperidine and pyridine alkaloid biosynthesis	1/10	1/17	0.588235	1	Phe	C00079	1	8/616	47/8018	0.0252435	1	Cs_ont_5g041500;Cs_ont_7g023970;Cs_ont_6g016840;Cs_ont_6g016790;Cs_ont_6g016760;Cs_ont_5g045250;Cs_ont_3g008580;Cs_ont_8g001850	K00276+K00276+K08081+K08081+K08081+K00276+K00660+K08081	8	https:\\www.genome.jp\dbget-bin\www_bget?map00960
ko00940	Phenylpropanoid biosynthesis	2/10	2/17	0.330882	1	t-CA;Phe	C00423+C00079	2	31/616	321/8018	0.10821	1	Cs_ont_4g007430;novel.102;novel.1067;Cs_ont_1g026230;novel.961;Cs_ont_2g034310;Cs_ont_2g008450;Cs_ont_3g027630;Cs_ont_3g033190;Cs_ont_3g026050;Cs_ont_1g026210;Cs_ont_3g029490;novel.1159;Cs_ont_9g023380;Cs_ont_5g016610;Cs_ont_2g008510;Cs_ont_3g019130;Cs_ont_2g008480;Cs_ont_3g026080;novel.134;Cs_ont_9g022460;Cs_ont_7g022960;Cs_ont_3g029470;Cs_ont_3g001830;Cs_ont_1g003110;Cs_ont_1g011170;Cs_ont_4g02…	K12355+K13065+K13066+K12356+K13065+K00430+K22395+K13065+K09753+K13065+K12356+K22395+K12356+K13065+K01904+K22395+K13065+K22395+K13065+K13065+K22395+K13065+K22395+K00083+K13065+K09753+K00430+K13065+K22395+K13065+K22395	31	https:\\www.genome.jp\dbget-bin\www_bget?map00940
ko00460	Cyanoamino acid metabolism	1/10	1/17	0.588235	1	Phe	C00079	1	8/616	64/8018	0.115462	1	Cs_ont_1g022500;Cs_ont_2g006950;Cs_ont_7g021630;Cs_ont_4g005190;Cs_ont_7g003070;Cs_ont_3g012380;Cs_ont_1g001580;Cs_ont_7g003060	K00600+K05350+K01188+K00600+K12153+K00600+K18592+K12153	8	https:\\www.genome.jp\dbget-bin\www_bget?map00460
ko00999	Biosynthesis of various plant secondary metabolites	2/10	2/17	0.330882	1	t-CA;Phe	C00423+C00079	2	14/616	135/8018	0.153643	1	Cs_ont_2g006950;Cs_ont_7g021630;Cs_ont_7g002960;Cs_ont_2g014470;Cs_ont_4g013100;Cs_ont_3g029060;Cs_ont_3g021000;Cs_ont_4g014420;Cs_ont_2g029410;Cs_ont_9g007840;Cs_ont_2g033330;Cs_ont_3g021060;Cs_ont_7g025290;Cs_ont_2g035130	K05350+K01188+K23136+K22374+K22374+K23136+K23136+K22374+K23260+K06892+K23260+K23136+K22374+K06892	14	https:\\www.genome.jp\dbget-bin\www_bget?map00999
ko00904	Diterpenoid biosynthesis	3/10	5/17	0.68552	1	GA24;GA53;GA29	C11861+C06094+C06096	3	5/616	41/8018	0.203902	1	Cs_ont_2g006770;Cs_ont_2g002160;novel.1295;Cs_ont_5g002240;Cs_ont_5g033110	K04125+K04125+K05282+K05282+K04125	5	https:\\www.genome.jp\dbget-bin\www_bget?map00904
ko00966	Glucosinolate biosynthesis	1/10	2/17	0.845588	1	Phe	C00079	1	3/616	22/8018	0.23655	1	Cs_ont_7g003070;Cs_ont_3g012880;Cs_ont_7g003060	K12153+K00826+K12153	3	https:\\www.genome.jp\dbget-bin\www_bget?map00966
ko00130	Ubiquinone and other terpenoid-quinone biosynthesis	1/10	1/17	0.588235	1	t-CA	C00423	1	7/616	66/8018	0.241877	1	Cs_ont_8g015890;Cs_ont_7g020440;Cs_ont_5g016610;Cs_ont_2g008040;novel.481;Cs_ont_5g047300;novel.1124	K23094+K14759+K01904+K14760+K09833+K02552+K09833	7	https:\\www.genome.jp\dbget-bin\www_bget?map00130
ko01230	Biosynthesis of amino acids	1/10	2/17	0.845588	1	Phe	C00079	1	22/616	244/8018	0.245035	1	Cs_ont_1g017780;Cs_ont_1g022500;Cs_ont_4g024260;Cs_ont_7g023930;Cs_ont_8g020190;Cs_ont_8g025250;Cs_ont_9g004320;Cs_ont_9g027600;Cs_ont_2g012460;Cs_ont_4g005190;Cs_ont_9g028070;Cs_ont_3g012380;Cs_ont_4g021230;Cs_ont_2g005360;Cs_ont_3g012880;Cs_ont_7g002290;Cs_ont_3g018350;Cs_ont_4g004930;novel.846;Cs_ont_5g015220;Cs_ont_2g008890;Cs_ont_3g025990	K00850+K00600+K15227+K14272+K01623+K00058+K01915+K00264+K01807+K00600+K00927+K00600+K01623+K01953+K00826+K15227+K01738+K00850+K01803+K00873+K01807+K01803	22	https:\\www.genome.jp\dbget-bin\www_bget?map01230
ko00996	Biosynthesis of various alkaloids	3/10	4/17	0.441176	1	t-CA;SA;Phe	C00423+C00805+C00079	3	1/616	4/8018	0.273718	1	Cs_ont_1g002510	K12644	1	https:\\www.genome.jp\dbget-bin\www_bget?map00996
ko00906	Carotenoid biosynthesis	2/10	3/17	0.639706	1	ABA;5DS	C06082+C18037	2	9/616	95/8018	0.305992	1	Cs_ont_2g002030;Cs_ont_5g050390;Cs_ont_8g002260;Cs_ont_6g025470;Cs_ont_5g042990;Cs_ont_8g008810;Cs_ont_6g013670;Cs_ont_5g011080;Cs_ont_3g024970	K09840+K17911+K09843+K09841+K09838+K09841+K09841+K17911+K02293	9	https:\\www.genome.jp\dbget-bin\www_bget?map00906
ko00360	Phenylalanine metabolism	2/10	2/17	0.330882	1	t-CA;Phe	C00423+C00079	2	5/616	49/8018	0.323103	1	Cs_ont_5g041500;Cs_ont_7g023970;Cs_ont_3g005820;Cs_ont_5g045250;Cs_ont_6g013870	K00276+K00276+K01593+K00276+K07253	5	https:\\www.genome.jp\dbget-bin\www_bget?map00360
ko00592	alpha-Linolenic acid metabolism	1/10	2/17	0.845588	1	MEJA	C11512	1	8/616	93/8018	0.423731	1	Cs_ont_5g013240;Cs_ont_2g033670;Cs_ont_5g026980;Cs_ont_2g033720;novel.308;Cs_ont_5g026990;Cs_ont_6g022630;Cs_ont_2g031990	K18857+K00454+K05894+K00454+K08241+K05894+K16818+K16818	8	https:\\www.genome.jp\dbget-bin\www_bget?map00592
ko00380	Tryptophan metabolism	1/10	3/17	0.948529	1	Indole	C00463	1	9/616	126/8018	0.639703	1	Cs_ont_5g009070;Cs_ont_5g046100;Cs_ont_6g024150;novel.1067;Cs_ont_3g005820;novel.719;novel.251;Cs_ont_9g010690;novel.165	K11816+K00128+K22588+K13066+K01593+K24541+K22588+K11816+K22588	9	https:\\www.genome.jp\dbget-bin\www_bget?map00380
ko01210	2-Oxocarboxylic acid metabolism	1/10	2/17	0.845588	1	Phe	C00079	1	4/616	68/8018	0.777557	1	Cs_ont_7g023930;Cs_ont_7g003070;Cs_ont_3g012880;Cs_ont_7g003060	K14272+K12153+K00826+K12153	4	https:\\www.genome.jp\dbget-bin\www_bget?map01210
ko00400	Phenylalanine, tyrosine and tryptophan biosynthesis	2/10	3/17	0.639706	1	Indole;Phe	C00463+C00079	2	2/616	55/8018	0.931944	1	Cs_ont_4g024260;Cs_ont_7g002290	K15227+K15227	2	https:\\www.genome.jp\dbget-bin\www_bget?map00400
LM3_vs_CK3
ko01100	Metabolic pathways	6/9	10/17	0.419375	1	ABA;Indole;GA24;GA53;t-CA;Phe	C06082+C00463+C11861+C06094+C00423+C00079	6	301/537	3382/8018	1.51978e-11	1.70216e-09	Cs_ont_1g000790;Cs_ont_1g009750;Cs_ont_1g011180;Cs_ont_1g024230;Cs_ont_1g025870;Cs_ont_2g001850;Cs_ont_2g001880;Cs_ont_2g002030;Cs_ont_2g006830;Cs_ont_2g015450;Cs_ont_2g025950;Cs_ont_2g029120;Cs_ont_2g034310;Cs_ont_3g010670;Cs_ont_5g028150;Cs_ont_5g031800;Cs_ont_5g032990;Cs_ont_5g046100;Cs_ont_6g003980;Cs_ont_6g020600;Cs_ont_6g023360;Cs_ont_7g000910;Cs_ont_7g017050;Cs_ont_7g022160;Cs_ont_8g007850…	K01858+K00058+K09753+K13260+K02716+K02115+K00430+K09840+K03146+K02699+K05298+K01673+K00430+K15920+K08099+K01051+K11517+K00128+K01602+K10775+K15397+K01100+K01114+K08908+K02639+K01620+K01623+K00975+K00026+K15893+K00423+K20547+K20547+K01915+K02692+K01728+K01051+K00264+K13066+K00696+K05298+K02694+K03841+K13248+K01653+K02641+K19891+K00855+K08916+K00826+K05894+K00059+K20547+K02636+K13606+K00588+K00826+…	301	https:\\www.genome.jp\dbget-bin\www_bget?map01100
ko00940	Phenylpropanoid biosynthesis	2/9	2/17	0.264706	1	t-CA;Phe	C00423+C00079	2	50/537	321/8018	1.16408e-08	1.30377e-06	Cs_ont_1g011180;Cs_ont_2g001880;Cs_ont_2g034310;Cs_ont_6g020600;novel.1067;Cs_ont_4g009920;Cs_ont_2g008450;Cs_ont_2g034230;Cs_ont_5g030190;Cs_ont_1g021960;Cs_ont_3g026050;Cs_ont_1g009820;Cs_ont_7g006400;Cs_ont_2g024310;Cs_ont_3g006980;Cs_ont_2g008300;Cs_ont_2g034300;novel.1159;Cs_ont_2g034290;Cs_ont_6g020620;Cs_ont_5g024640;Cs_ont_3g029490;Cs_ont_3g019130;Cs_ont_4g025760;Cs_ont_1g026210;Cs_ont_1g…	K09753+K00430+K00430+K10775+K13066+K00588+K22395+K00430+K13066+K00430+K13065+K01904+K10775+K00430+K00430+K22395+K00430+K12356+K00430+K10775+K13065+K22395+K13065+K00430+K12356+K00083+K12356+K13065+K13065+K00430+K22395+K13065+K22395+K00430+K13065+K22395+K13066+K22395+K00430+K13065+K22395+K09753+K00430+K00430+K13065+K13065+K00487+K00430+K09753+K13065	50	https:\\www.genome.jp\dbget-bin\www_bget?map00940
ko01110	Biosynthesis of secondary metabolites	8/9	14/17	0.452941	1	ABA;Indole;GA24;GA7;GA53;t-CA;Phe;5DS	C06082+C00463+C11861+C11867+C06094+C00423+C00079+C18037	8	191/537	2036/8018	3.75565e-08	4.20633e-06	Cs_ont_1g000790;Cs_ont_1g008510;Cs_ont_1g009750;Cs_ont_1g011180;Cs_ont_1g024230;Cs_ont_2g001880;Cs_ont_2g002030;Cs_ont_2g034310;Cs_ont_3g003070;Cs_ont_5g000210;Cs_ont_5g028150;Cs_ont_5g032990;Cs_ont_5g046100;Cs_ont_6g003200;Cs_ont_6g003980;Cs_ont_6g020600;Cs_ont_6g023360;Cs_ont_7g017050;Cs_ont_8g011730;Cs_ont_8g020190;Cs_ont_8g021290;Cs_ont_8g027320;Cs_ont_8g027960;Cs_ont_9g027600;novel.1067;Cs_o…	K01858+K15813+K00058+K09753+K13260+K00430+K09840+K00430+K00279+K15404+K08099+K11517+K00128+K09843+K01602+K10775+K15397+K01114+K01620+K01623+K00975+K00026+K15893+K00264+K13066+K00696+K14593+K03841+K01653+K00826+K05894+K00059+K13606+K00588+K00826+K20623+K02437+K14157+K00121+K00640+K14272+K22395+K13545+K18857+K15813+K05280+K00430+K15404+K13260+K00830+K09841+K00975+K20623+K13066+K05359+K05894+K08081+…	191	https:\\www.genome.jp\dbget-bin\www_bget?map01110
ko04075	Plant hormone signal transduction	1/9	3/17	0.917647	1	ABA	C06082	1	66/537	700/8018	0.00237336	0.265816	Cs_ont_5g005120;Cs_ont_5g038030;Cs_ont_9g027570;Cs_ont_6g009950;Cs_ont_4g026430;Cs_ont_4g025270;Cs_ont_3g019530;Cs_ont_5g004380;Cs_ont_8g023780;Cs_ont_5g012720;Cs_ont_4g006060;Cs_ont_5g011900;Cs_ont_2g000710;Cs_ont_4g005550;Cs_ont_6g013980;Cs_ont_1g017070;Cs_ont_1g002080;Cs_ont_6g000160;Cs_ont_4g002310;Cs_ont_4g005740;Cs_ont_9g024590;Cs_ont_2g030120;Cs_ont_8g004560;Cs_ont_7g011760;Cs_ont_7g014070…	K13422+K16189+K14497+K14493+K14504+K13422+K14484+K14496+K14491+K14484+K14515+K14516+K14494+K13415+K14496+K14484+K14494+K13416+K14484+K14484+K14497+K13416+K14486+K14491+K14431+K13416+K14494+K14493+K14510+K14489+K13422+K13416+K13422+K14494+K14504+K14486+K14490+K13415+K14493+K14504+K14510+K14490+K14491+K13416+K14491+K14504+K13416+K14487+K14496+K14488+K13415+K14487+K14504+K14484+K13416+K14491+K14487+…	66	https:\\www.genome.jp\dbget-bin\www_bget?map04075
ko00906	Carotenoid biosynthesis	2/9	3/17	0.547059	1	ABA;5DS	C06082+C18037	2	10/537	95/8018	0.102379	1	Cs_ont_2g002030;Cs_ont_6g003200;Cs_ont_8g008290;Cs_ont_8g008780;Cs_ont_5g033020;Cs_ont_8g024610;Cs_ont_1g004040;Cs_ont_7g017960;Cs_ont_5g011080;Cs_ont_4g003170	K09840+K09843+K14593+K09841+K09840+K09843+K09838+K09840+K17911+K09838	10	https:\\www.genome.jp\dbget-bin\www_bget?map00906
ko00360	Phenylalanine metabolism	2/9	2/17	0.264706	1	t-CA;Phe	C00423+C00079	2	6/537	49/8018	0.107096	1	Cs_ont_6g020600;Cs_ont_7g006400;Cs_ont_6g020620;Cs_ont_2g022750;Cs_ont_6g013870;Cs_ont_3g005820	K10775+K10775+K10775+K00815+K07253+K01593	6	https:\\www.genome.jp\dbget-bin\www_bget?map00360
ko00380	Tryptophan metabolism	1/9	3/17	0.917647	1	Indole	C00463	1	12/537	126/8018	0.136905	1	Cs_ont_5g046100;novel.1067;Cs_ont_5g030190;Cs_ont_5g009070;Cs_ont_6g024150;Cs_ont_7g025150;novel.719;novel.251;Cs_ont_9g010690;novel.250;Cs_ont_3g005820;Cs_ont_5g026850	K00128+K13066+K13066+K11816+K22588+K11820+K24541+K22588+K11816+K22588+K01593+K13066	12	https:\\www.genome.jp\dbget-bin\www_bget?map00380
ko00130	Ubiquinone and other terpenoid-quinone biosynthesis	1/9	1/17	0.529412	1	t-CA	C00423	1	7/537	66/8018	0.151069	1	Cs_ont_1g009820;Cs_ont_8g015890;Cs_ont_2g022750;novel.561;novel.1124;Cs_ont_2g008040;Cs_ont_4g024900	K01904+K23094+K00815+K09833+K09833+K14760+K00487	7	https:\\www.genome.jp\dbget-bin\www_bget?map00130
ko00966	Glucosinolate biosynthesis	1/9	2/17	0.794118	1	Phe	C00079	1	3/537	22/8018	0.179559	1	Cs_ont_3g012870;Cs_ont_3g012880;Cs_ont_7g025150	K00826+K00826+K11820	3	https:\\www.genome.jp\dbget-bin\www_bget?map00966
ko02010	ABC transporters	1/9	1/17	0.529412	1	Phe	C00079	1	11/537	121/8018	0.186206	1	Cs_ont_8g015870;Cs_ont_1g020390;Cs_ont_1g020360;Cs_ont_1g014990;Cs_ont_1g021480;Cs_ont_1g015000;Cs_ont_1g018510;Cs_ont_7g004310;Cs_ont_6g018540;Cs_ont_1g015010;Cs_ont_1g015020	K05681+K05666+K05666+K05681+K05681+K05681+K05658+K05658+K05681+K05681+K05681	11	https:\\www.genome.jp\dbget-bin\www_bget?map02010
ko00999	Biosynthesis of various plant secondary metabolites	2/9	2/17	0.264706	1	t-CA;Phe	C00423+C00079	2	12/537	135/8018	0.192562	1	Cs_ont_2g029410;Cs_ont_3g021060;Cs_ont_1g005360;Cs_ont_3g032920;Cs_ont_3g021890;Cs_ont_8g010150;Cs_ont_7g002920;Cs_ont_2g033300;Cs_ont_3g021000;Cs_ont_5g025610;novel.635;Cs_ont_7g002880	K23260+K23136+K23260+K22374+K21568+K05349+K23136+K23260+K23136+K22374+K05349+K23136	12	https:\\www.genome.jp\dbget-bin\www_bget?map00999
ko00996	Biosynthesis of various alkaloids	2/9	3/17	0.547059	1	t-CA;Phe	C00423+C00079	2	1/537	4/8018	0.242206	1	Cs_ont_3g009620	K12644	1	https:\\www.genome.jp\dbget-bin\www_bget?map00996
ko01230	Biosynthesis of amino acids	1/9	2/17	0.794118	1	Phe	C00079	1	19/537	244/8018	0.279139	1	Cs_ont_1g009750;Cs_ont_8g011730;Cs_ont_8g020190;Cs_ont_9g004320;Cs_ont_9g027600;Cs_ont_2g010740;Cs_ont_3g012870;Cs_ont_3g012880;Cs_ont_4g020390;Cs_ont_7g023930;Cs_ont_8g007110;Cs_ont_1g022500;Cs_ont_8g000470;Cs_ont_4g021230;novel.846;Cs_ont_3g018350;Cs_ont_3g027930;Cs_ont_2g008890;Cs_ont_3g025990	K00058+K01620+K01623+K01915+K00264+K01653+K00826+K00826+K00640+K14272+K05359+K00600+K01953+K01623+K01803+K01738+K01695+K01807+K01803	19	https:\\www.genome.jp\dbget-bin\www_bget?map01230
ko00904	Diterpenoid biosynthesis	4/9	6/17	0.373303	1	GA24;GA7;GA53;GA29	C11861+C11867+C06094+C06096	4	4/537	41/8018	0.293791	1	Cs_ont_7g018070;Cs_ont_5g033110;novel.1295;Cs_ont_7g011490	K04125+K04125+K05282+K04123	4	https:\\www.genome.jp\dbget-bin\www_bget?map00904
ko01210	2-Oxocarboxylic acid metabolism	1/9	2/17	0.794118	1	Phe	C00079	1	5/537	68/8018	0.482182	1	Cs_ont_2g010740;Cs_ont_3g012870;Cs_ont_3g012880;Cs_ont_7g023930;Cs_ont_7g025150	K01653+K00826+K00826+K14272+K11820	5	https:\\www.genome.jp\dbget-bin\www_bget?map01210
ko00960	Tropane, piperidine and pyridine alkaloid biosynthesis	1/9	1/17	0.529412	1	Phe	C00079	1	3/537	47/8018	0.618271	1	Cs_ont_6g016840;Cs_ont_2g022750;Cs_ont_6g016790	K08081+K00815+K08081	3	https:\\www.genome.jp\dbget-bin\www_bget?map00960
ko00460	Cyanoamino acid metabolism	1/9	1/17	0.529412	1	Phe	C00079	1	4/537	64/8018	0.629369	1	Cs_ont_1g023830;Cs_ont_1g022500;Cs_ont_8g010150;novel.635	K01455+K00600+K05349+K05349	4	https:\\www.genome.jp\dbget-bin\www_bget?map00460
ko00400	Phenylalanine, tyrosine and tryptophan biosynthesis	2/9	3/17	0.547059	1	Indole;Phe	C00463+C00079	2	3/537	55/8018	0.722675	1	Cs_ont_8g007110;Cs_ont_2g022750;Cs_ont_3g027930	K05359+K00815+K01695	3	https:\\www.genome.jp\dbget-bin\www_bget?map00400
LM4_vs_CK3
ko00904	Diterpenoid biosynthesis	4/9	6/18	0.309955	1	GA24;GA7;GA53;GA29	C11861+C11867+C06094+C06096	4	5/327	41/8018	0.0246034	1	Cs_ont_4g017310;Cs_ont_4g017320;Cs_ont_5g002240;novel.1295;Cs_ont_9g000810	K04125+K04125+K05282+K05282+K04125	5	https:\\www.genome.jp\dbget-bin\www_bget?map00904
ko00380	Tryptophan metabolism	1/9	3/18	0.897059	1	TRA	C00398	1	10/327	126/8018	0.0327713	1	Cs_ont_5g046100;Cs_ont_9g016320;novel.1067;Cs_ont_3g005820;Cs_ont_9g010690;novel.250;Cs_ont_1g027440;Cs_ont_7g025150;novel.839;Cs_ont_8g028430	K00128+K13066+K13066+K01593+K11816+K22588+K00128+K11820+K13066+K22588	10	https:\\www.genome.jp\dbget-bin\www_bget?map00380
ko01110	Biosynthesis of secondary metabolites	7/9	15/18	0.897059	1	TRA;GA24;GA7;GA53;JA;SA;5DS	C00398+C11861+C11867+C06094+C08491+C00805+C18037	7	97/327	2036/8018	0.0419425	1	Cs_ont_2g007570;Cs_ont_2g008450;Cs_ont_2g025700;Cs_ont_2g029030;Cs_ont_5g046100;Cs_ont_5g048560;Cs_ont_6g003980;Cs_ont_8g020190;novel.961;Cs_ont_1g019190;Cs_ont_6g023360;Cs_ont_9g016320;novel.1067;Cs_ont_5g042940;Cs_ont_4g024260;Cs_ont_5g032990;novel.85;Cs_ont_2g034230;Cs_ont_7g006400;Cs_ont_3g027630;Cs_ont_1g008300;Cs_ont_4g005190;Cs_ont_2g008480;Cs_ont_5g006630;Cs_ont_6g015280;Cs_ont_1g002760;C…	K16818+K22395+K00660+K08695+K00128+K20772+K01602+K01623+K13065+K20623+K15397+K13066+K13066+K16818+K15227+K11517+K13065+K00430+K10775+K13065+K15813+K00600+K22395+K13508+K13508+K05278+K03841+K01853+K02437+K00318+K12153+K01087+K01904+K03809+K04125+K22395+K15404+K01188+K00430+K16818+K00430+K01593+K01662+K00815+K09838+K23094+K18857+K00430+K04125+K18693+K09840+K23136+K01853+K22395+K00454+K01114+K00430+…	97	https:\\www.genome.jp\dbget-bin\www_bget?map01110
ko01100	Metabolic pathways	5/9	11/18	0.832579	1	TRA;GA24;GA53;JA;SA	C00398+C11861+C06094+C08491+C00805	5	153/327	3382/8018	0.0482705	1	Cs_ont_1g000870;Cs_ont_2g006830;Cs_ont_2g007570;Cs_ont_2g008450;Cs_ont_2g025700;Cs_ont_2g029030;Cs_ont_5g046100;Cs_ont_5g048560;Cs_ont_6g003980;Cs_ont_8g000640;Cs_ont_8g008740;Cs_ont_8g014690;Cs_ont_8g020190;Cs_ont_8g028720;Cs_ont_9g018380;novel.961;Cs_ont_2g005780;Cs_ont_2g017340;Cs_ont_1g019190;Cs_ont_6g023360;Cs_ont_9g016320;novel.1067;Cs_ont_8g028710;Cs_ont_2g029120;Cs_ont_5g042940;Cs_ont_7g0…	K00423+K03146+K16818+K22395+K00660+K08695+K00128+K20772+K01602+K05857+K14332+K08917+K01623+K20547+K19893+K13065+K03885+K08913+K20623+K15397+K13066+K13066+K20547+K01673+K16818+K24221+K08916+K01915+K15227+K02692+K11517+K01100+K13065+K00430+K10775+K08907+K01535+K01051+K13065+K13248+K08908+K08915+K12309+K01051+K00600+K00799+K22395+K01897+K13508+K13508+K08901+K05278+K03841+K01853+K02437+K00318+K02695+…	153	https:\\www.genome.jp\dbget-bin\www_bget?map01100
ko00996	Biosynthesis of various alkaloids	1/9	4/18	0.958824	1	SA	C00805	1	1/327	4/8018	0.153449	1	Cs_ont_3g009620	K12644	1	https:\\www.genome.jp\dbget-bin\www_bget?map00996
ko00592	alpha-Linolenic acid metabolism	1/9	2/18	0.764706	1	JA	C08491	1	6/327	93/8018	0.178545	1	Cs_ont_2g007570;Cs_ont_5g042940;Cs_ont_2g031990;Cs_ont_5g013240;Cs_ont_2g033670;Cs_ont_5g027020	K16818+K16818+K16818+K18857+K00454+K05894	6	https:\\www.genome.jp\dbget-bin\www_bget?map00592
ko04075	Plant hormone signal transduction	3/9	4/18	0.288235	1	JA-ILE;JA;SA	C18699+C08491+C00805	3	32/327	700/8018	0.271985	1	Cs_ont_2g000710;Cs_ont_4g016660;Cs_ont_6g000160;Cs_ont_7g010850;Cs_ont_8g002370;Cs_ont_1g020930;Cs_ont_4g026430;Cs_ont_4g005740;Cs_ont_4g026440;Cs_ont_5g011250;Cs_ont_4g026340;Cs_ont_4g002310;novel.1424;Cs_ont_5g030560;Cs_ont_8g002350;Cs_ont_7g002120;Cs_ont_5g033850;Cs_ont_5g024390;Cs_ont_3g028960;Cs_ont_4g026420;Cs_ont_6g009970;Cs_ont_4g004790;Cs_ont_8g027120;Cs_ont_5g008520;Cs_ont_8g009750;Cs_o…	K14494+K14494+K13416+K13422+K14494+K13416+K14504+K14484+K14504+K14484+K14504+K14484+K13416+K14488+K14494+K14496+K13415+K14493+K14486+K14504+K14493+K14484+K13449+K14487+K14493+K14491+K13449+K14491+K14487+K13416+K13416+K13416	32	https:\\www.genome.jp\dbget-bin\www_bget?map04075
ko00906	Carotenoid biosynthesis	1/9	3/18	0.897059	1	5DS	C18037	1	5/327	95/8018	0.345899	1	Cs_ont_1g004040;Cs_ont_5g033020;Cs_ont_3g005090;Cs_ont_5g011080;Cs_ont_1g028210	K09838+K09840+K09843+K17911+K09843	5	https:\\www.genome.jp\dbget-bin\www_bget?map00906
